# Supplementary material for: Cold atmospheric plasma-assisted deposition of ammonium functionalized glass coatings for enhanced antibacterial properties
Source: Royal Society of Chemistry journal article supplement (doi:10.1039/d5tc00520e), 2025-01-01
Supplement: d5tc00520e1.pdf [file d5tc00520e1.pdf]

## Supporting Information

### Cold Atmospheric Plasma-Assisted Deposition of Ammonium Functionalized Glass Coating for Enhanced Antibacterial Properties

Venkat Kasi<sup>a, b, #</sup>, Md Mahabubur Rahman<sup>b, c, #</sup>, Akshay Krishnakumar<sup>b, c, #</sup>, Ulisses Heredia Rivera<sup>a, b</sup>, Devendra Sarnaik<sup>a, b</sup>, Mithun Sinha<sup>d</sup>, and Rahim Rahimi<sup>a, b\*</sup>

<sup>a</sup>School of Materials Engineering, Purdue University, West Lafayette, IN 47907, USA.

<sup>b</sup>Birck Nanotechnology Center, Purdue University, West Lafayette, IN 47907, USA.

<sup>c</sup>School of Electrical and Computer Engineering, Purdue University, West Lafayette, IN 47907, USA.

<sup>d</sup>Division of Plastic Surgery, Department of Surgery, Indiana University School of Medicine, Indianapolis, IN 46202, USA

\*Corresponding author email: [rrahimi@purdue.edu](mailto:rrahimi@purdue.edu)

#Authors contributed equally to the manuscript

**Keywords:** Silica coating, Cold Atmospheric Plasma, Antibacterial Surfaces, Functionalized Ammonium Compound

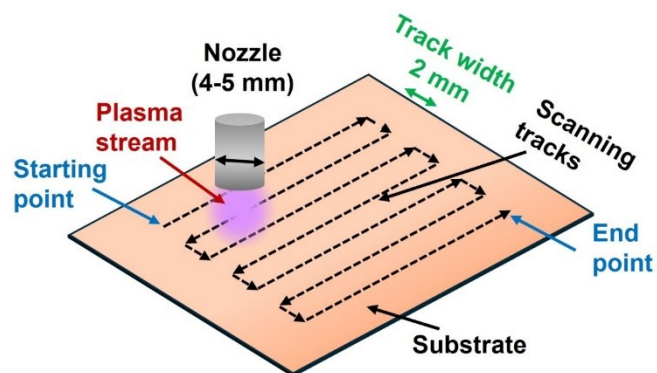

**Figure S1:** Schematic illustration of AF-SiO<sub>x</sub> coatings deposition pattern using cold atmospheric plasma assisted deposition technique.

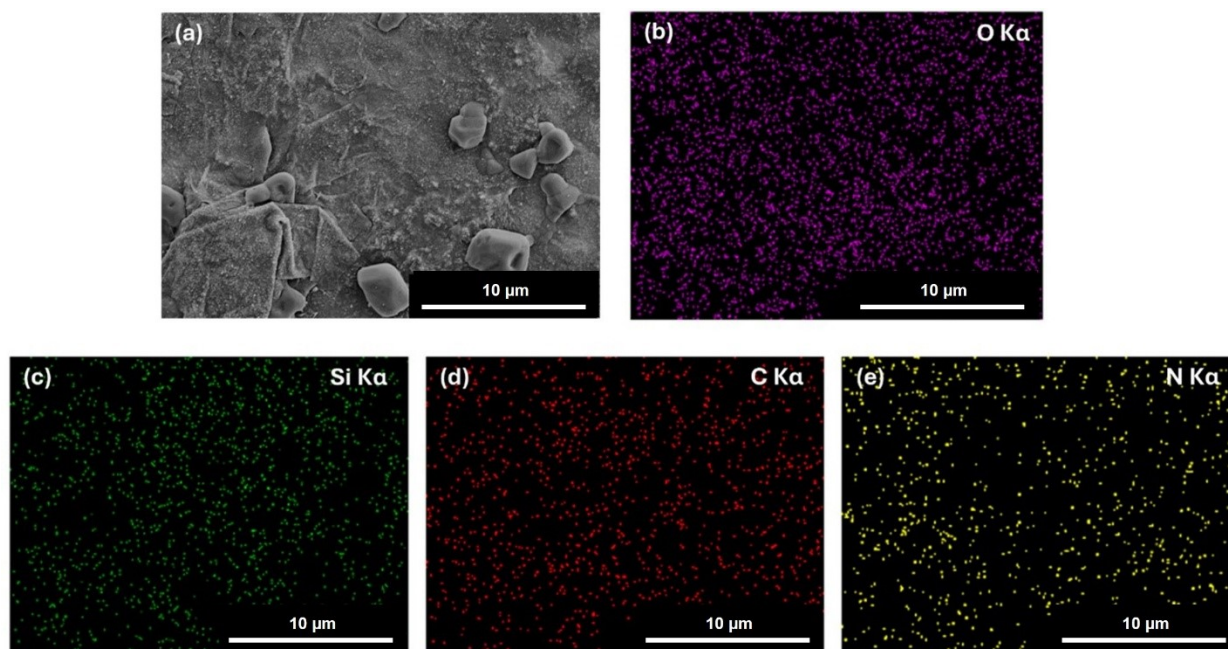

**Figure S2.** (a) High magnification SEM image of silica coating prepared with 1.0 wt% APS in the precursor mixture and EDX mapping for (b) O K $\alpha$ , (c) Si K $\alpha$ , (d) C K $\alpha$ , and (e) N K $\alpha$  for the same image.

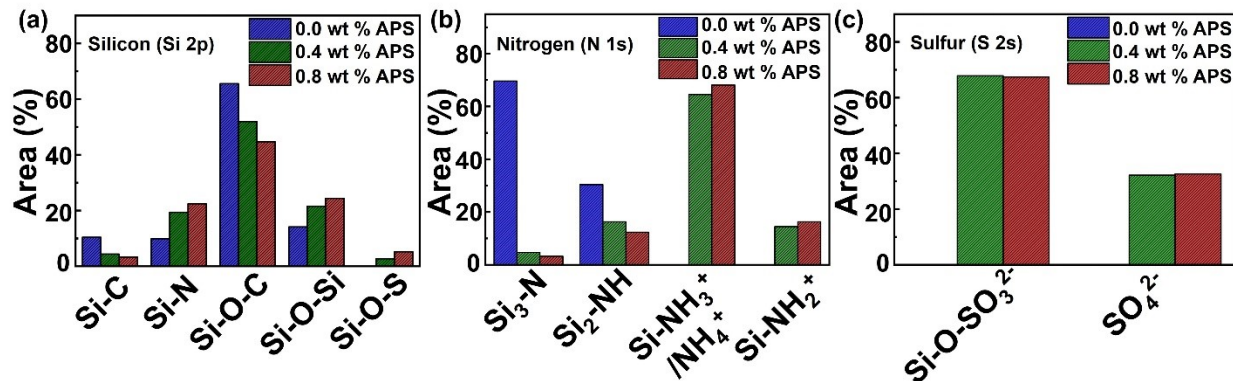

**Figure S3:** Deconvoluted high-resolution narrow scan spectra analysis for the coatings prepared with varying APS concentrations (0 wt%, 0.4 wt% and 0.8 wt%) in the precursor mixture. The area percentages of (a) Si 2p species (Si-C, Si-O-C, Si-O-Si, Si-N, Si-O-S), (b) N 1s species (Si<sub>3</sub>-N, Si-NH<sub>3</sub><sup>+</sup>/NH<sub>4</sub><sup>+</sup>, Si-NH<sub>2</sub><sup>+</sup>, Si<sub>2</sub>-NH), and (c) S 2p species (Si-O-SO<sub>3</sub><sup>2-</sup>, SO<sub>4</sub><sup>2-</sup>) under the deconvoluted high-resolution XPS spectrum.

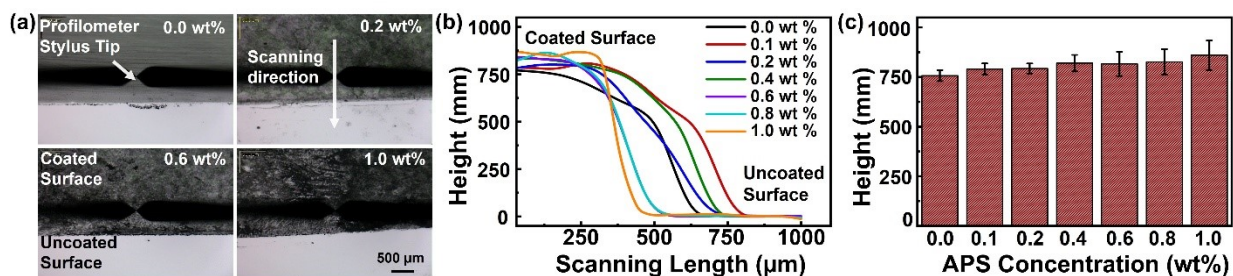

**Figure S4:** Thickness measurement of the AF-SiO<sub>x</sub> coatings prepared with varying concentrations of APS in the precursor mixture ranging from 0 to 1wt%. (a) Transverse scanning line and the direction of the profilometer stylus on the AF-SiO<sub>x</sub> coated samples, (b) Step profile line of profilometer measured on the AF-SiO<sub>x</sub> coated substrate, showing the difference in height between the coated and the uncoated area of the substrate, and (c) Average thickness of AF-SiO<sub>x</sub> coatings deposited with varying concentration of APS in the precursor mixture.

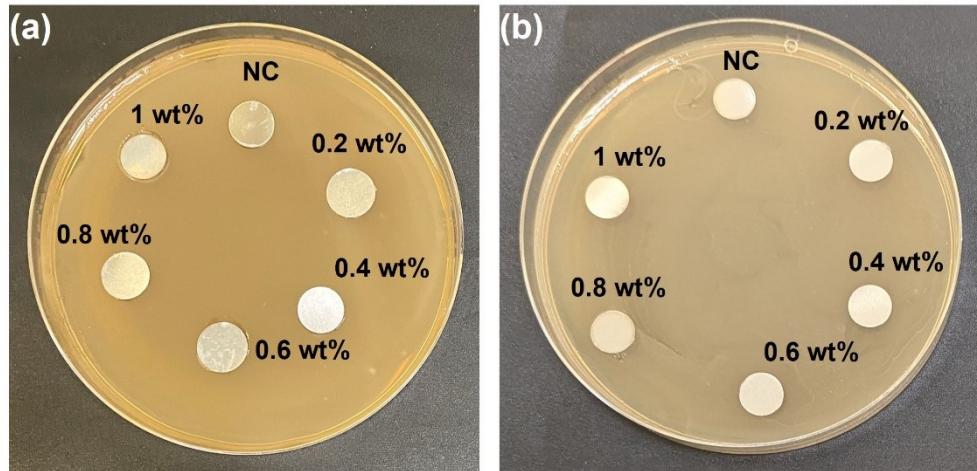

**Figure S5:** Inhibition zone analysis of CAP assisted AF-SiO<sub>x</sub> coated SS substrates with increasing concentration of APS concentration against (a) *E. coli* and (b) *S. aureus* bacterial populations. (NC: negative control, plain SS)

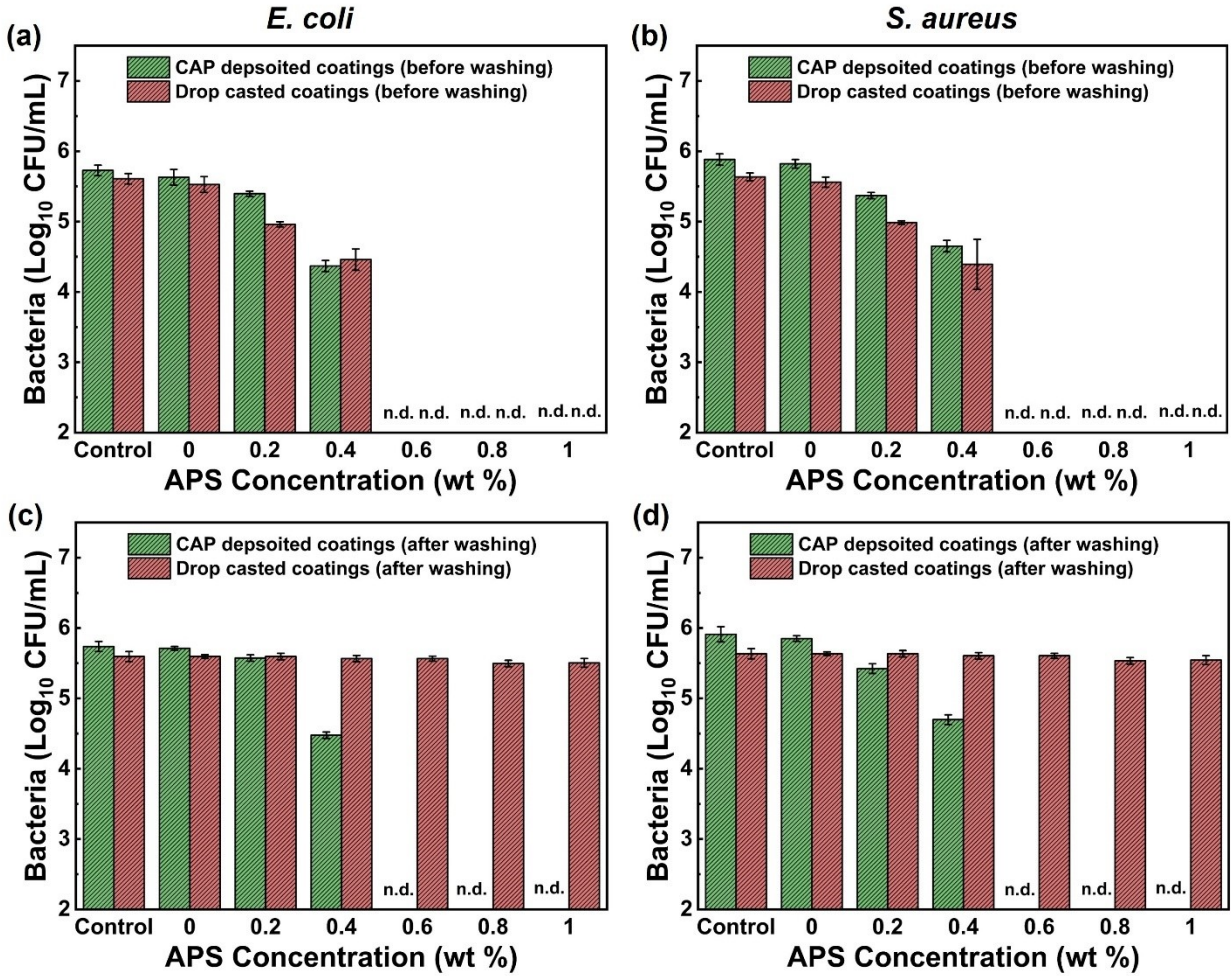

**Figure S6:** Antibacterial contact killing analysis of AF-SiO<sub>x</sub>-coated SS substrates with varying APS concentrations in as-prepared and after incubation in simulated body fluid (SBF). Antibacterial property of the drop casted and CAP assisted AF-SiO<sub>x</sub> coating with various APS concentration before washing in SBF against (a) *E. coli*, (b) *S. aureus*, and drop-casted and CAP assisted SiO<sub>x</sub> coating with various APS concentration after washing in SBF against (c) *E. coli*, and (d) *S. aureus*.

**Table S1:** Atomic weight percentage of different species (C, O, N, Si and S) with varying concentration of APS in precursor mixture.

| APS concentration (wt %) | Carbon (At %) | Oxygen (At %) | Nitrogen (At %) | Silicon (At %) | Sulfur (At %) |
|--------------------------|---------------|---------------|-----------------|----------------|---------------|
| 0                        | 12.32         | 60.89         | 0.4             | 26.39          | 0             |
| 0.4                      | 15.14         | 57.17         | 2.76            | 21.37          | 3.57          |
| 0.8                      | 14.75         | 56.7          | 4.66            | 18.8           | 5.1           |
